# Supplementary material for: Evaluation of Biological Equivalence for Generic Tulathromycin Injections in Cattle
Source: MDPI journal article supplement (doi:10.3390/ijms242216262), 2023-11-13
Supplement: s1 [file s1]

## Supplementary Information

The original drug, Draxxin, and its SPC (Summary of Product Characteristics) indicate that the active ingredient (tulathromycin) and the excipients' content are identical in all the generic products. At the time of approval, products with the same ingredients, content, administration method, and dosage were granted sales authorization. Compositions of the innovator and generic tulathromycin injections are presented below.

### <Draxxin>

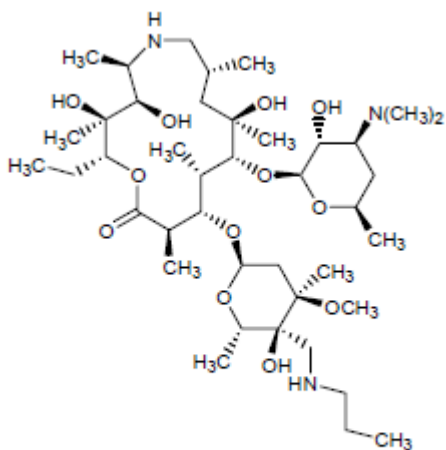

CP-472,295

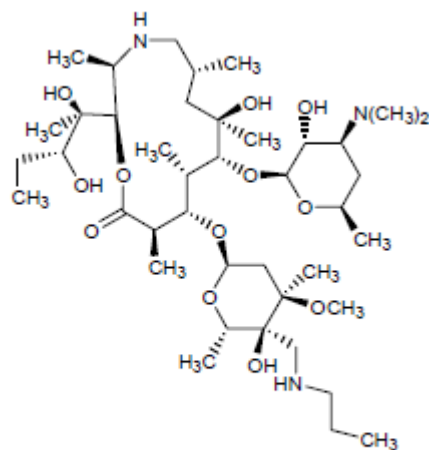

CP-547,272

| Ingredients           | Amount in 1 mL of Drug |
|-----------------------|------------------------|
| Tulathromycin         | 100mg                  |
| Monothioglycerin      | 5.0mg                  |
| Anhydrous Citric Acid | 19.2mg                 |
| Hydrochloric Acid     | 19.0mg                 |
| Sodium Hydroxide      | Appropriate amount     |
| Propylene Glycol      | 500mg                  |
| Water for Injection   | Appropriate amount     |

## <Generics>

### Tulathromycin A

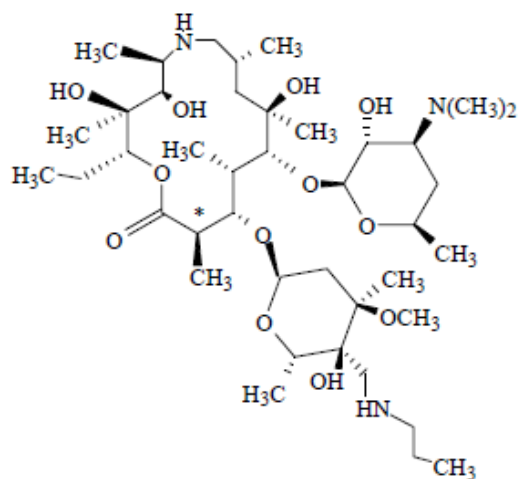

### Tulathromycin B

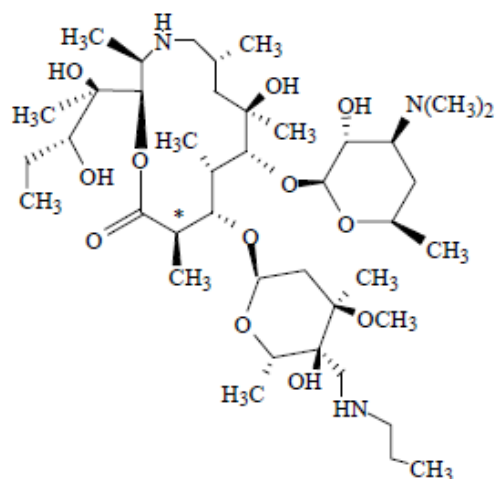

| Ingredients           | Amount in 1 mL of Drug |
|-----------------------|------------------------|
| Tulathromycin         | 100mg                  |
| Monothioglycerin      | 5.0mg                  |
| Anhydrous Citric Acid | 19.2mg                 |
| Hydrochloric Acid     | 19.0mg                 |
| Sodium Hydroxide      | Appropriate amount     |
| Propylene Glycol      | 500mg                  |
| Water for Injection   | Appropriate amount     |
